# Supplementary material
Source: PubMed Central journal article supplement (PMC4306683)

**Supplemental Figure: ApoB containing lipoprotein retention was associated with the extend of atherosclerosis in the aortic sinus**

Mice were injected with ad-SAA, ad-Null or saline and fed normal rodent chow for 16 weeks. Atherosclerotic lesions from within the aortic sinus were double stained for apoB (red) and biglycan (green); apoB (green) and perlecan (red); or biglycan (green) and SAA (red). Co-localization is indicated by yellow. Shown are fluorescent images magnified 20X, representative of 4 mice per group. The asterisk indicates the lumen of the aortic sinus. Scale bar 100mm.

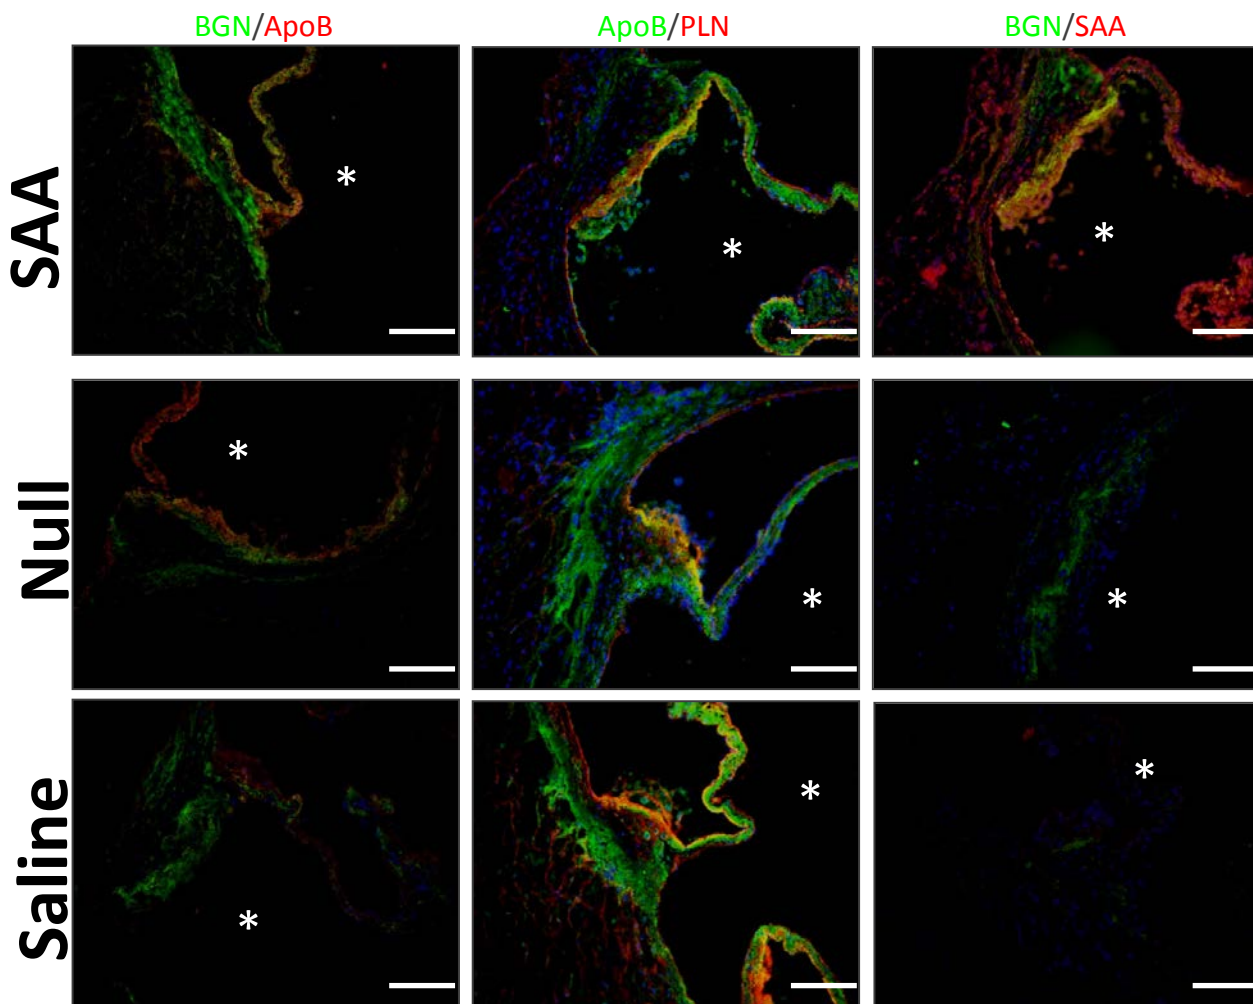

Supplement: supp_M054015_jlr.M054015-1.pdf [file supp_M054015_jlr.M054015-1.pdf]
